# Supplementary material for: Multifunctional polyplex micelles for efficient microRNA delivery and accelerated osteogenesis
Source: Royal Society of Chemistry journal article supplement (doi:10.1039/d1nr02638k), 2021-01-01
Supplement: d1nr02638k1.pdf [file d1nr02638k1.pdf]

## **Multifunctional Polyplex Micelles for Efficient MicroRNA Delivery and Accelerated Osteogenesis**

Qian Li, Zhiai Hu, Xin Rong, and Xiaohua Liu\*

*Department of Biomedical Sciences,  
Texas A&M University College of Dentistry, Dallas, TX 75246, USA*

\*Correspondence to:

Xiaohua Liu, PhD

Associate Professor

Department of Biomedical Sciences

Texas A&M University College of Dentistry

3302 Gaston Ave., Dallas, TX 75246

Phone: 214-370-7007

Fax: 214-874-4538

Email: [xliu1@tamu.edu](mailto:xliu1@tamu.edu)

**Table S1.** Primer sequences for qRT-PCR.

| Gene    | Primer sequence                                               |
|---------|---------------------------------------------------------------|
| miR-218 | UUGUGCUUGAUCUAACCAUGU                                         |
| ALP     | F: ACTGCGCTCCTTAGGGCT<br>R: GGCAGCGTCAGATGTTAATTG             |
| RUNX2   | F: AGTGCTCTAACCACAGTCCATGCA<br>R: TACAAACCATAACCCAAGTACCTGTTT |
| Col1    | F: GATGGTGCATCACTCAATGG<br>R: TATGCGCACTTCAAAAACCA            |
| OCN     | F: GGTAGTGAACAGACTCCGGC<br>R: CAAGCAGGGTTAAGCTCACA            |
| DKK2    | F: TCAGTCAGCCAACCGATCTG<br>R: TCTCTGTGGCATCGTTTCTTTT          |
| SFRP2   | F: CCCCTGTCTGTCTCGACGA<br>R: CTTACACACCTTGGGAGCTT             |
| SOST    | F: AGCCTTCAGGAATGATGCCAC<br>R: CTTTGGCGTCATAGGGATGGT          |
| PCNA    | F: TTTCACAAAAGCCACTCCACTG<br>R: CTTTAAGTGTCCCATGTCAGCAAT      |
| GAPDH   | F: TTGATGGCAACAATCTCCAC<br>R: CGTCCCGTAGACAAAATGGT            |

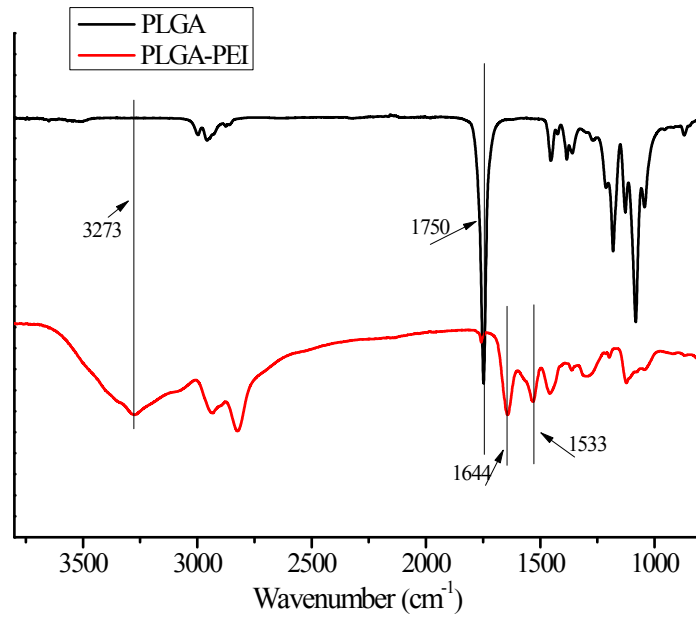

**Fig. S1** FT-IR spectra of synthesized PLGA copolymers and PLGA-PEI triblock copolymer.

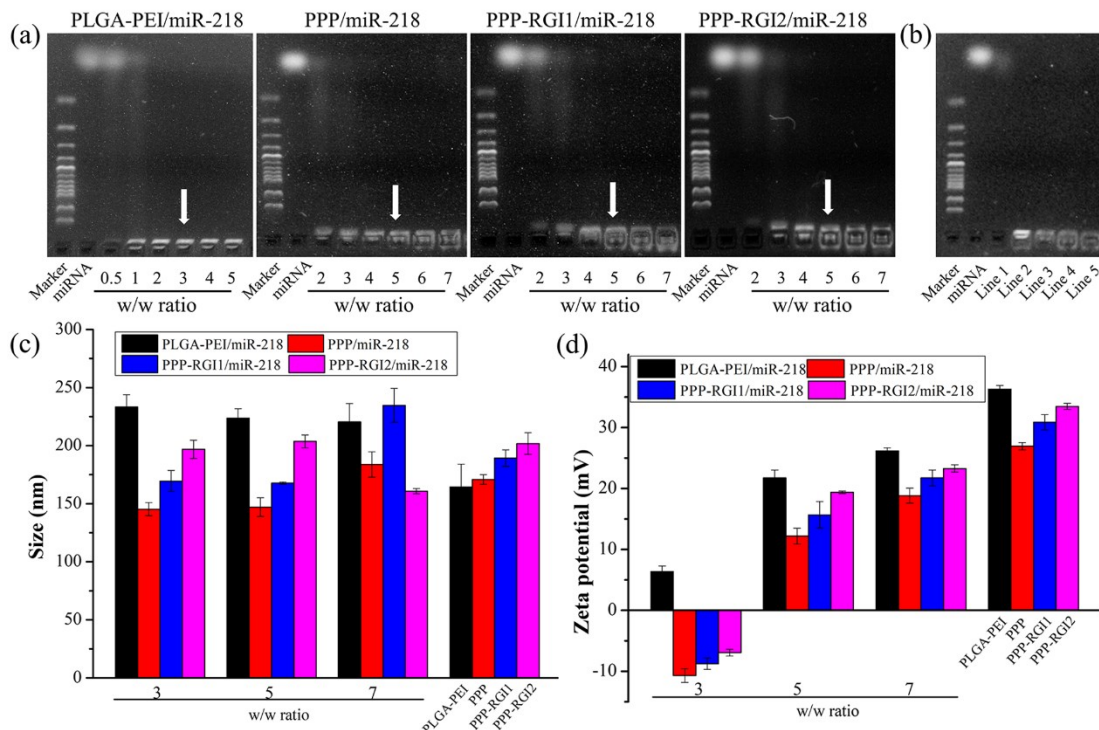

**Fig. S2** (a) miR-218 condensation ability of various complexes. (b) Agarose gel electrophoresis for the assessment of miRNA stabilization against RNase degradation after incubation for 4 h. Line 1: miR-218 only as negative control, Line 2: PLGA-PEI/miR-218, Line 3: PPP/miR-218, Line 4: PPP-RG11/miR-218, Line 5: PPP-RG12/miR-218.

Line 4: PPP-RGI1/miR-218, and Line 5: PPP-RGI2/miR-218. (c, d) Sizes and zeta potentials of micelles/miR-218 complexes at various w/w ratios.

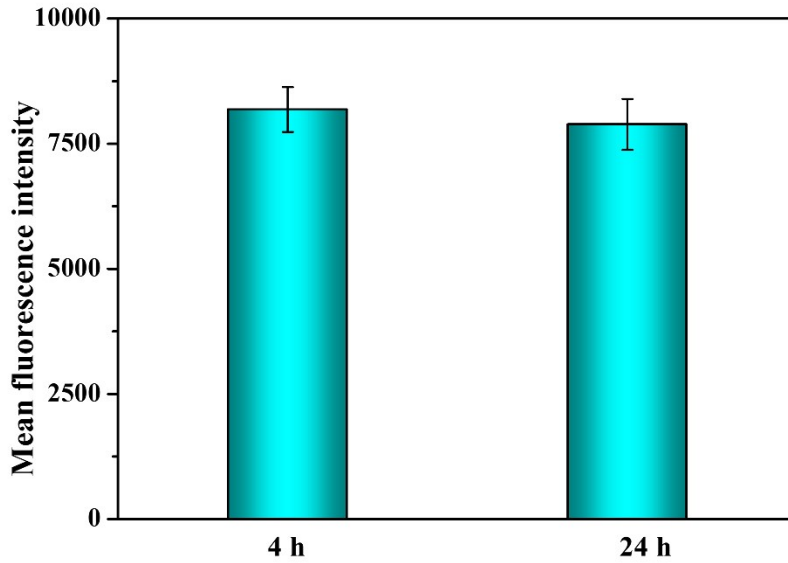

**Fig. S3** Mean fluorescence intensity of PPP-RGI2/miR-218 treated group after cultured for 4 h and 24 h.

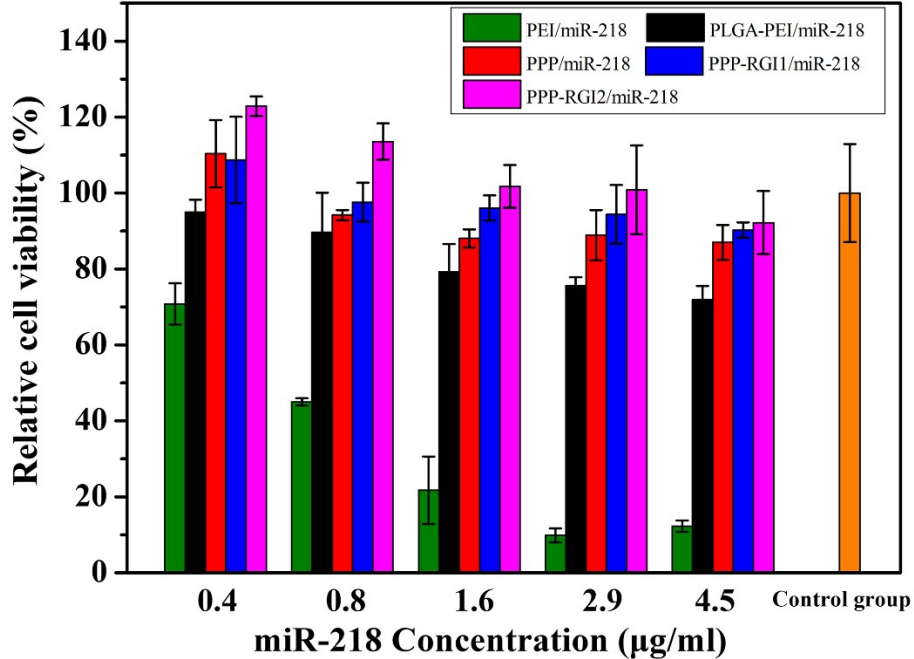

**Fig. S4** Relative cell viability of BMSCs at different miR-218 concentration after treated for three days. DNA concentration ranging from 0.4 to 4.5 µg/mL at w/w ratio of 5.
